# Supplementary material
Source: publisher site journal article supplement (https://www.dovepress.com/article/558648)
Supplement: Supplementary file 1 [file Supplementary%20information_revised_1.docx]

**Supplementary information**

**Methods**

**DNA extraction**DNA was extracted from 250 μg aliquots of the saliva samples using the NucleoSpin 96 Soil kit (Macherey-Nagel). Bead beating was done horizontally on a Vortex-Genie 2 at 2700 rpm for 5 minutes. A minimum of one negative control was included per batch of samples from the DNA extraction and throughout the laboratory process (including sequencing). A ZymoBIOMICS Microbial Community Standard (Zymo Research) was also included in the analysis as a positive (mock) control.

**DNA sequencing**Before library preparation, the DNA was quantified by an Infinite F Nano+ plate reader (Tecan) using the Quant-iT dsDNA Assay Kit (Thermo Fisher). The genomic DNA was normalized to 10 ng/μl. The enzymatic fragmentation of DNA and library construction was conducted by DreamPrep NGS (Tecan) using Celero EZ DNA-seq Core Module Kit (Tecan). The fragmented DNA was amplified using PCR. Short and large DNA fragments were removed using double sided magnetic bead size selection (AMPure XP, Beckman Coulter). Adapter sequences from Celero 96-Plex Adaptor Plate (Tecan) were added to each sample during library construction. The final concentration for each library was quantified by Infinite F Nano+ Plate Reader (Tecan) using NuQuant NGS Library Quantification Module and Qubit 2.0 (Thermo Fisher).

Qubit and TapeStation were used to determine the concentration of the final library before sequencing. The library was sequenced on a NovaSeq system (Illumina) with 2 x 150 bp read lengths.

**Gene catalogue and species definitions**The Clinical Microbiomics Human Microbiome Reference HMR05 gene catalogue is derived primarily from high-quality (HQ) prokaryotic MAGs (metagenome-assembled genomes) identified from 30,382 human microbiome samples collected from nine distinct human body sites: gut (n = 19,296), oral (n = 4994), skin (n = 4306), urine (n = 934), small intestine (n = 780), nasopharyngeal (n = 422), vaginal (n = 367), airway (n = 108), and milk (n = 100). This includes MAGs available from UHGG 1 and from ELGG 2. 11% (n = 3317) of the samples were not publicly available. In addition, genome assemblies from NCBI and PATRIC were added to capture otherwise missing species of interest (human-associated pathogens, probiotics, food ingredients, and species relevant for benchmarking). Human-relevant eukaryotic species were manually identified from various sources, including an analysis of gut fungal species 3, publicly available lists of pathogens, the eukaryotes profiled by MetaPhlAn 4 4, and various species relevant for benchmarking, resulting in 2740 genomes representing 244 species.

For MAGs not obtained from publicly available MAG collections, reads were host-filtered, trimmed, and assembled into contigs with Megahit 5 or metaSPAdes 6, and then binned using VAMB 7. MAGs were considered high-quality if they had > 90% completeness and < 5% contamination based on CheckM2 (v. 2022-07-19) and passed the GUNC chimerism test 8. All MAGs were taxonomically annotated using GTDB-Tk 9 with GTDB database version r214, 10. To combine MAGs from multiple VAMB batches and MAG collections, MAGs annotated to the same species were merged into species clusters. MAGs without GTDB-Tk species-level annotations were merged with each other or with existing species clusters at 95% ANI 11; FastANI 12). This resulted in 6567 prokaryotic species clusters, 10% of which were unannotated at species level.

To derive a pan-genome catalogue for each species, we used a three-step clustering approach. First, genes were clustered with MMseqs2 13 with 98% identity and 90% bi-directional coverage. Second, the representatives from the first iteration were clustered with MMseqs2 with 95% identity and 90% bi-directional coverage. Representatives of the second iteration were chosen as the ones with highest cardinality from the first iteration. Third, the second iteration representatives were clustered with cd-hit (cd-hit-est, 14 with 95% identity and 90% coverage of the shorter sequence. Genes shorter than 100 bp or with species prevalence < 1% were discarded.

For prokaryotes and eukaryotes separately, the entire set of pangenomes were then clustered with MMseqs2 with 97% identity and 90% bi-directional coverage to obtain between-species clusters. The pan-genomes from prokaryotic (n = 6567) and eukaryotic (n = 244) species were merged into a final gene catalogue of 25,761,278 genes.

To enable quantification of each species in the database, up to 250 signature genes were selected for each species based on core genes (≥ 60% prevalence in species MAGs) with a length ≥ 200 bp and ≤ 20 kbp. Furthermore, signature genes were required to be species-unique, with no alignments of 100 bp with > 97% sequence-identity to other genes in the catalogue; however, if fewer than 20 genes meeting these criteria were available for a species, then genes with segments > 200 bp without alignments to other genes were used, and non-unique segments of these genes were masked.

**Sequencing data preprocessing**Raw FASTQ files were filtered to remove human genomic contamination by discarding read pairs in which either read mapped to the human reference genome GRCh38.p14 with Bowtie2 15) in local alignment mode. Reads were then trimmed to remove adapters and bases with a Phred score below 30 using AdapterRemoval 16. Host-filtered read pairs with both lengths ≥ 100 bp, defined as high-quality non-host (HQNH) reads, were retained.

**Mapping reads to the gene catalogue**High-quality non-host (HQNH) reads were mapped to the gene catalogue using BWA mem 17). An individual read was considered uniquely mapped to a gene if the mapping quality (MAPQ) was ≥ 20 and the read aligned with ≥ 95 % identity over ≥ 100 bp. However, if > 10 bases of the read did not align to the gene or extend beyond the gene, the read was considered unmapped. Reads meeting the alignment length and identity criteria but not the MAPQ threshold were considered multi-mapped.

Each read pair was counted as either 1) uniquely mapped to a specific gene, if one or both individual reads were uniquely mapped to a gene, or 2) multi-mapped, if neither read was uniquely mapped, and at least one was multi-mapped, or 3) unmapped, if both individual reads were unmapped. If the two reads were each uniquely mapped to a different gene, the gene mapped by read 1 was counted but not the gene mapped by read 2. A gene count table was created with the number of uniquely mapped read pairs for each gene.

**Species relative abundance calculation**The expected read counts for signature genes in each species in each sample were modelled with a negative binomial distribution as follows. First, if >=50 of the signature genes for a species had non-zero read counts and >=99% of genes were expected to have non-zero read counts given the total read count for that species (1-(((n_genes-1)/n_genes)^n_reads)>=0.99), then signature genes with zero reads were ignored in that sample. Second, the expected 99% quantile (between 0.5% and 99.5%) of read counts were calculated for each gene based on a negative binomial distribution with a mean proportional to the effective gene length (accounting for read length and mapping alignment criteria) and dispersion defined as log2(effective gene length). The abundance of each species was then calculated as the mean read count normalised by effective gene length based on reads mapping to signature genes with observed read counts within the expected 99% quantile. Species abundances were set to zero if less than 5 genes with non-zero read counts were within the 99% quantile. Furthermore, species with <66% of genes with non-zero read count within the 99% quantile were set to zero, unless the median abundance of signature genes was non-zero, in which case the median gene-length- corrected abundance of non-zero genes was used. Abundances were then normalized sample-wise such that the total abundance of all species sums to 100 %.

Rarefied species abundance profiles were calculated by random sampling, without replacement, of a fixed number of signature gene counts per sample, and then following the procedure described above. In this study, 9074 signature gene counts were sampled.

The relative abundances of microbial taxa were recomputed while excluding the signal from the set of species identified as background.

**Background signal removal**Species signals that likely originate from amplification of reagent contaminants or other background signals were identified using two different approaches. The first approach was data driven, where the abundance profiles of the different species indicate that they are likely background species de Goffau et al. 2018 18. Here, species with high negative correlation with sequencing depth (Spearman correlation coefficient < -0.80) were considered background species. Furthermore, clusters of species that were pairwise correlated (Spearman correlation coefficient > 0.90 in at least four samples) with uniform abundance ratios were also considered background signal. The relative abundances of microbial taxa were recomputed while excluding the signal from the set of species identified as background.

**Functional annotation and profiling**EggNOG-mapper 19 was used to map prokaryotic genes in the gene catalogue to the EggNOG orthologous groups database 20 and Kyoto Encyclopedia of Genes and Genomes (KEGG) Orthology (KO) database. Eukaryotic genes were annotated using KofamScan 21. Functional potential profiles based on KOs were calculated as the proportion of the total gene abundance that mapped to a given KO. CAZyme annotations were inferred for each gene using run_dbcan 22, retaining annotations that were identified by both HMMER (E < 1e-15, coverage > 0.5) and DIAMOND (E < 1e-100).

Kyoto Encyclopedia of Genes and Genomes (KEGG) modules 23 are defined as a set of Kyoto Encyclopedia of Genes and Genomes orthologys (KOs) that enable a specific function or pathway. Functional potential profiles based on KEGG modules were generated from the species profiles. For this, we identified the set of species associated to each of the KEGG modules by following three criteria: 1) a species was associated to a KEGG module if it included at least 2/3 of the genes encoding the proteins/enzymes needed to complete the functionality of the module, 2) if a module had alternative reaction paths, only one of these was required to be 2/3 complete, 3) for modules with three or fewer steps, all steps were required to be comprised in the given species. KEGG module profiles based on counts, relative abundances, rarefied counts and rarefied relative abundances were then calculated by adding, respectively, the number of counts, relative abundances, rarefied counts and rarefied relative abundances from each species associated to a given KEGG module.

**Diversity estimates**Alpha and beta diversity estimates were calculated from rarefied abundance matrices, created by random sampling of reads without replacement. All samples were represented by the same number of informative sequencing reads: rarefaction of species abundance was performed by sampling only from reads mapping to species signature genes (with rarefaction target of 9074 reads).

Alpha diversity was calculated as richness (number of species observed in a sample) and as Shannon diversity index, which in addition accounts for the abundance evenness of the species. Both measures were calculated from rarefied species abundance estimates.

Changes in overall microbiome community composition were evaluated using Bray-Curtis dissimilarity, which accounts for differences in relative abundances of species among samples. Bray-Curtis dissimilarity can range between 0-1, where 0 means that two samples have identical compositions - they share all species at same relative abundance. A value of 1 means that the two samples are completely different - they do not share any species. For visual interpretation, the samples are projected onto the first two dimensions of a principal coordinates analysis (PCoA) of the Bray-Curtis dissimilarities.

**Statistics**Permutational multivariate analysis of variance (PERMANOVA) tests were performed using the adonis2 function from the vegan R package with 1000 permutations and by = “margin”, thus assessing the marginal effects of the terms (i.e., each marginal term analysed in a model with all other variables). With 1000 permutations, the lowest possible P value is 1/1001 = 0.000999.

Differences between taxa abundances and KEGG module abundances were tested in two ways: using Mann-Whitney *U* -test (to match the previous study *gehpso*), as well as with a linear regression model, adjusting for variables smoking and diet. Mann-Whitney *U* -test was also used to determine statistical significance when associating taxa and KEGG module abundances to PASI scores.

When performing statistical testing on multiple hypotheses, we use the Benjamini–Hochberg (BH) method to control the false discovery rate (FDR) at a level of 10 %. In case both groups compared to each other have very low median relative abundance, the FDR-corrected p-value cannot be calculated.

**Differential abundance analysis with LinDA framework**Testing for differences in microbiome taxon abundances was performed with a linear regression framework with a compositional bias correction based on LinDA 24. For each sample individually, the zero-omitted relative taxon abundances were transformed with a centred log-ratio transformation (CLR) to account for the compositional structure of the data 25. To be robust against outliers in the data, winsorization was performed, capping the CLR-transformed abundances at their 3rd and 97th percentile. For each taxon present in at least 5 of the samples in each group, a linear regression model was fitted with the taxon as the outcome. Any bias in the coefficients arising from the compositional structure of the data was identified and adjusted for based on the assumption that the modal regression coefficient across all tested taxa should be zero 24. The reported effect sizes are the bias-corrected coefficients from the linear models. Due to the log transformation of the data, the coefficients can be interpreted as log2 fold changes.

For abundance analysis, pairwise comparisons between study groups were performed by contrasting the estimated marginal means for each study group with the R package “emmeans” 26. Standard deviations were estimated by the Huber-White sandwich formula to account for heteroscedastic errors via the “sandwich” R package 27. Test statistics were defined as T-values, i.e., bias-corrected coefficients divided by their standard deviation, and P-values were derived from the t-distribution for abundance testing and from the normal distribution for prevalence testing. The following model was applied: ∼ 𝐺𝑅𝑂𝑈𝑃 + 𝑠𝑚𝑜𝑘𝑖𝑛𝑔 + 𝑑𝑖𝑒𝑡, allowing for adjustment of variables smoking and diet. The abundance tests were performed at species, genus, family, class, order and phylum levels. Multiple testing correction was performed separately for each taxonomy level. A taxon prevalence filter of >=5 in each group was applied. To control the false discovery rate due to multiple testing, the P-values were adjusted using the Benjamini and Hochberg procedure 28. Test results were considered significant at the level of 0.1.

**Results**

In total 123 samples were extracted and sequenced. Of the 123 samples, 118 were successfully sequenced (Table S1).

**Sequencing quality**We obtained good sequencing data meeting the contract specification (6 Gbp ~ 20 M read pairs) for all samples with an average of 16.7 M read pairs per sample and a minimum of 8.2 M read pairs. (Figure S1). Most of the reads (on average 99.4%) were of high quality.

The samples contained high proportions of host (human) DNA (on average 14.3M read pairs, 85.4%) which decreases the proportion of microbial DNA available for microbiome analysis. However, for most samples (115/123, 93.5%), we obtained high numbers of read pairs mapping to the gene catalogue despite the high amount of host DNA, see Table S2.

**Taxonomic overview**Taxonomical profiling of the microbiome composition was performed using the Clinical Microbiomics Human Microbiome Profiler that identifies and quantifies Metagenomic Species (MGSs)7,29.

We found 965 out of 6809 MGS with relative abundance higher than zero across all samples. The 5844 MGS that were not found were removed from any downstream analysis.

Taxonomic profiles aggregated at species level are shown in Figure S5.

Taxonomic profiles aggregated at genus level are shown in Figure S6.

**Tables**

Table S1: Number of samples received and successfully sequenced for each sample type.

|  | PSO | CONTROL | FAMILY | Total |
| --- | --- | --- | --- | --- |
| All | 52 | 50 | 21 | 123 |
| Successfully sequenced | 49 | 48 | 21 | 118 |

Table S2: Average, minimum and maximum values of quality control and read mapping **statistics**.

|  | Min | Average | Max |
| --- | --- | --- | --- |
| Read pairs | 8.2 M | 16.7 M | 27.2 M |
| High quality reads | 8.2 M | 16.6 M | 26.6 M |
| High quality non-host reads | 0.0 M | 2.3 M | 11.4 M |

Table S3: Permutational multivariate analysis of variance (PERMANOVA) test of differences in β-diversity without adjustment for diet, smoking and physical activity.

|  | Sum of squares | R2 | P value |
| --- | --- | --- | --- |
| Group | 0.510 | 2.1% | 0.196 |
| Residual | 24.144 | 97.9% | NA |
| Total | 24.654 | 100% | NA |

Table S4:Permutational multivariate analysis of variance (PERMANOVA) test of differences in β-diversity based on smoking status.

|  | Sum of squares | R2 | P value |
| --- | --- | --- | --- |
| Smoking | 0.754 | 3.1% | 0.001 |
| Residual | 23.900 | 96.9% | NA |
| Total | 24.654 | 100% | NA |

|  | Sum of squares | R2 | P value |
| --- | --- | --- | --- |
| Diet | 0.375 | 1.5% | 0.037 |
| Residual | 24.279 | 98.5% | NA |
| Total | 24.654 | 100% | NA |

Table S5: Permutational multivariate analysis of variance (PERMANOVA) test of differences in β-diversity based on diet.

Table S6: Top 10 species that are affected by variable GROUP in Mann-Whitney U test. The median relative abundance (in percent) of each taxon in each group is shown. Table is sorted by increasing nominal P-values. RBC: rank biserial correlation, is a measure of the effect size. FDR: the FDR-adjusted P-value

| Taxonomy | Comparison | Mann-Whitney U | | | | | |
| --- | --- | --- | --- | --- | --- | --- | --- |
| RBC | P | FDR | Median (%) | | |
| CONTROL | FAMILY | PSO |
| Leptotrichia sp018128225 | CONTROL vs PSO | -0.401 | 0.000 | 0.079 | 0.028 | 0.018 | 0.000 |
| Butyrivibrio sp015258065 | CONTROL vs PSO | -0.409 | 0.000 | 0.117 | 0.136 | 0.086 | 0.055 |
| Leptotrichia sp018128225 | FAMILY vs PSO | -0.452 | 0.001 | 0.380 | 0.028 | 0.018 | 0.000 |
| F0428 sp003043955 | CONTROL vs PSO | -0.364 | 0.002 | 0.290 | 0.279 | 0.283 | 0.057 |
| Peptidiphaga gingivicola | FAMILY vs PSO | -0.190 | 0.002 |  | 0.000 | 0.000 | 0.000 |
| Saccharimonas sp018127705 | CONTROL vs FAMILY | 0.380 | 0.003 | 0.998 | 0.000 | 0.009 | 0.000 |
| Streptococcus pseudopneumoniae M | FAMILY vs PSO | -0.415 | 0.005 | 0.733 | 0.027 | 0.097 | 0.022 |
| Streptococcus parasanguinis | FAMILY vs PSO | -0.415 | 0.006 | 0.733 | 0.196 | 0.371 | 0.180 |

Table S7: Top 10 families that are affected by variable GROUP in Mann-Whitney U test. The median relative abundance (in percent) of each taxon in each group is shown. Table is sorted by increasing nominal P-values. RBC: rank biserial correlation, is a measure of the effect size. FDR: the FDR-adjusted P-value.

| Taxonomy | Comparison | Mann-Whitney U | | | | | |
| --- | --- | --- | --- | --- | --- | --- | --- |
| RBC | P | FDR | Median (%) | | |
| CONTROL | FAMILY | PSO |
| Leptotrichiaceae | CONTROL vs PSO | -0.385 | 0.001 | 0.059 | 1.091 | 0.928 | 0.503 |
| Lachnospiraceae | FAMILY vs PSO | -0.465 | 0.002 | 0.135 | 2.196 | 2.132 | 1.250 |
| Lachnospiraceae | CONTROL vs PSO | -0.331 | 0.004 | 0.139 | 2.196 | 2.132 | 1.250 |
| Nanosyncoccaceae | FAMILY vs PSO | -0.408 | 0.007 | 0.161 | 0.563 | 0.769 | 0.366 |
| Leptotrichiaceae | FAMILY vs PSO | -0.404 | 0.008 | 0.161 | 1.091 | 0.928 | 0.503 |
| UBA660 | FAMILY vs PSO | -0.341 | 0.013 | 0.205 | 0.000 | 0.015 | 0.000 |
| Trichinellidae | CONTROL vs FAMILY | 0.215 | 0.016 | 0.932 | 0.000 | 0.000 | 0.000 |
| Campylobacteraceae | FAMILY vs PSO | -0.354 | 0.019 | 0.244 | 1.198 | 1.466 | 0.976 |
| Selenomonadaceae | CONTROL vs PSO | -0.248 | 0.033 | 0.551 | 1.499 | 1.240 | 0.932 |
| Burkholderiaceae A | CONTROL vs PSO | -0.236 | 0.043 | 0.551 | 0.526 | 0.609 | 0.291 |

Table S8: Top 10 KEGG modules that are affected by variable GROUP in Mann-Whitney U test. The median relative abundance (in percent) of each KEGG module in each group is shown. Table is sorted by increasing nominal P-values. RBC: rank biserial correlation, is a measure of the effect size. FDR: the FDR-adjusted P-value.

| Taxonomy | Comparison | Mann-Whitney U | | | | | |
| --- | --- | --- | --- | --- | --- | --- | --- |
| RBC | P | FDR | Median (%) | | |
| CONTROL | FAMILY | PSO |
| M00278 – PTS sustem, sorbose-specific II component | CONTROL vs PSO | -0.392 | 0.001 | 0.301 | 0.086 | 0.058 | 0.019 |
| M00002 – Glycolysis, core module involving three-carbon compounds | FAMILY vs PSO | 0.489 | 0.001 | 0.303 | 77.009 | 73.149 | 78.853 |
| M00506 – CheA-CheYBV (chemotaxis) two-component regulatory system | CONTROL vs PSO | -0.371 | 0.002 | 0.301 | 2.801 | 2.542 | 1.912 |
| M00496 – ComD-ComE (competence) two-component regulatory system | FAMILY vs PSO | -0.463 | 0.002 | 0.303 | 0.880 | 1.270 | 0.799 |
| M00096 – C5 isoprenoid biosynthesis, non-mevalonate pathway | FAMILY vs PSO | 0.453 | 0.003 | 0.303 | 67.531 | 65.038 | 69.167 |
| M00002 – Glycolysis, core module involving three-carbon compounds | CONTROL vs FAMILY | -0.427 | 0.005 | 0.857 | 77.009 | 73.149 | 78.853 |
| M00212 – Ribose transport system | CONTROL vs PSO | -0.323 | 0.007 | 0.706 | 9.278 | 7.077 | 6.885 |
| M00153 – Cytochrome d ubiquinol oxidase | FAMILY vs PSO | 0.402 | 0.008 | 0.520 | 59.175 | 56.271 | 60.349 |
| M00362 – Nucleotide sugar biosynthesis, prokaryotes | CONTROL vs FAMILY | -0.392 | 0.009 | 0.857 | 22.864 | 20.047 | 20.141 |
| M00632 – Galactose degradation, Leloir pathway, galactose => alpha-D-glucose-1P | CONTROL vs FAMILY | -0.392 | 0.009 | 0.857 | 60.884 | 56.482 | 59.100 |

Table S9: Overall counts of all the eucaryotes present in at least one sample. Count is number of samples.

| Species | Count | Superkingdom |
| --- | --- | --- |
| Saccharomyces cerevisiae | 4 | Eukaryota |
| Candida parapsilosis | 1 | Eukaryota |
| Candida tropicalis | 1 | Eukaryota |
| Candida dubliniensis | 3 | Eukaryota |
| Nakaseomyces glabratus | 1 | Eukaryota |
| Trichnella patagoniensis | 27 | Eukaryota |

**Figures**

Figure S1: Bar plots summarizing read quality and read mapping for all samples grouped by variable GROUP.


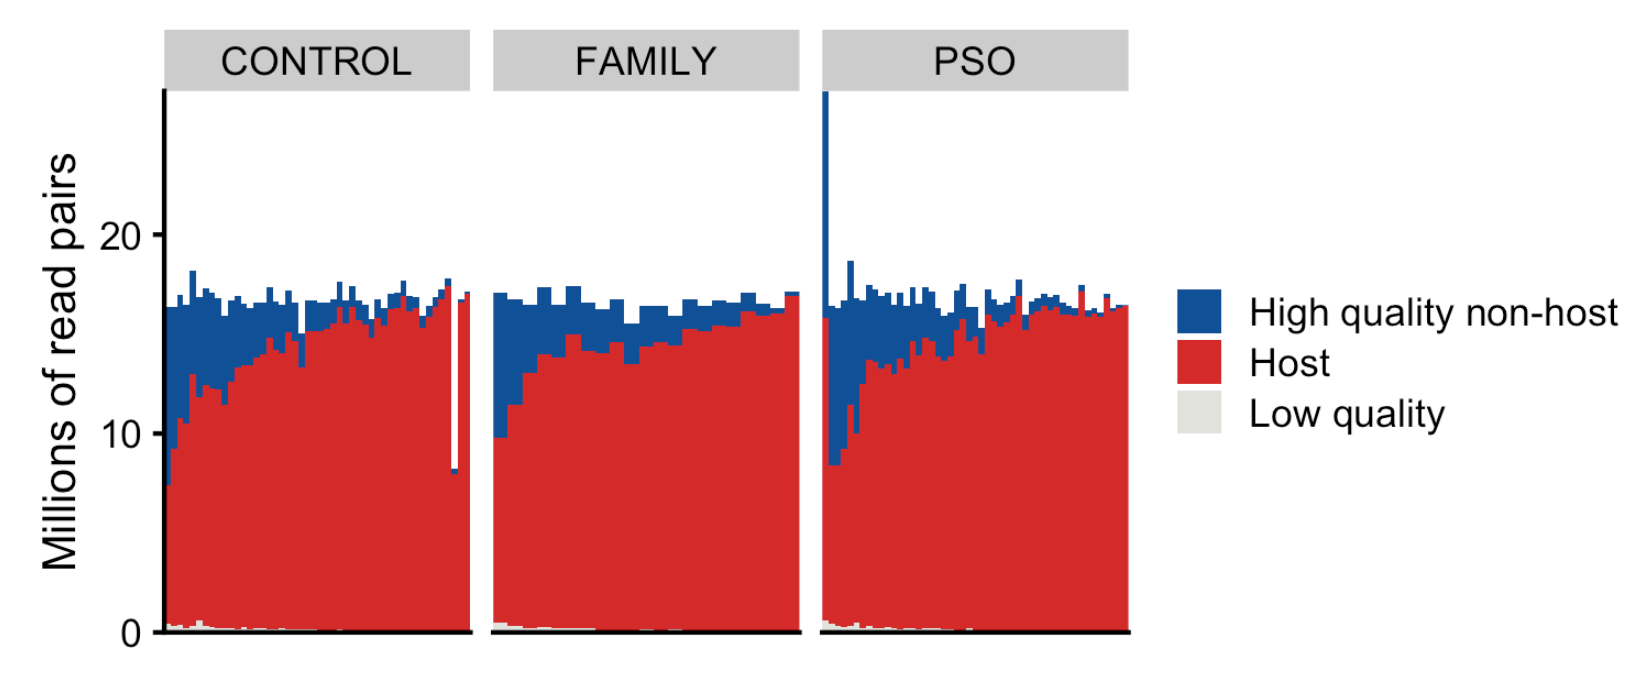


Figure S2: Proportion of read pairs. Bar plots summarizing read quality and read mapping. Categories of different read types are given in percentages.
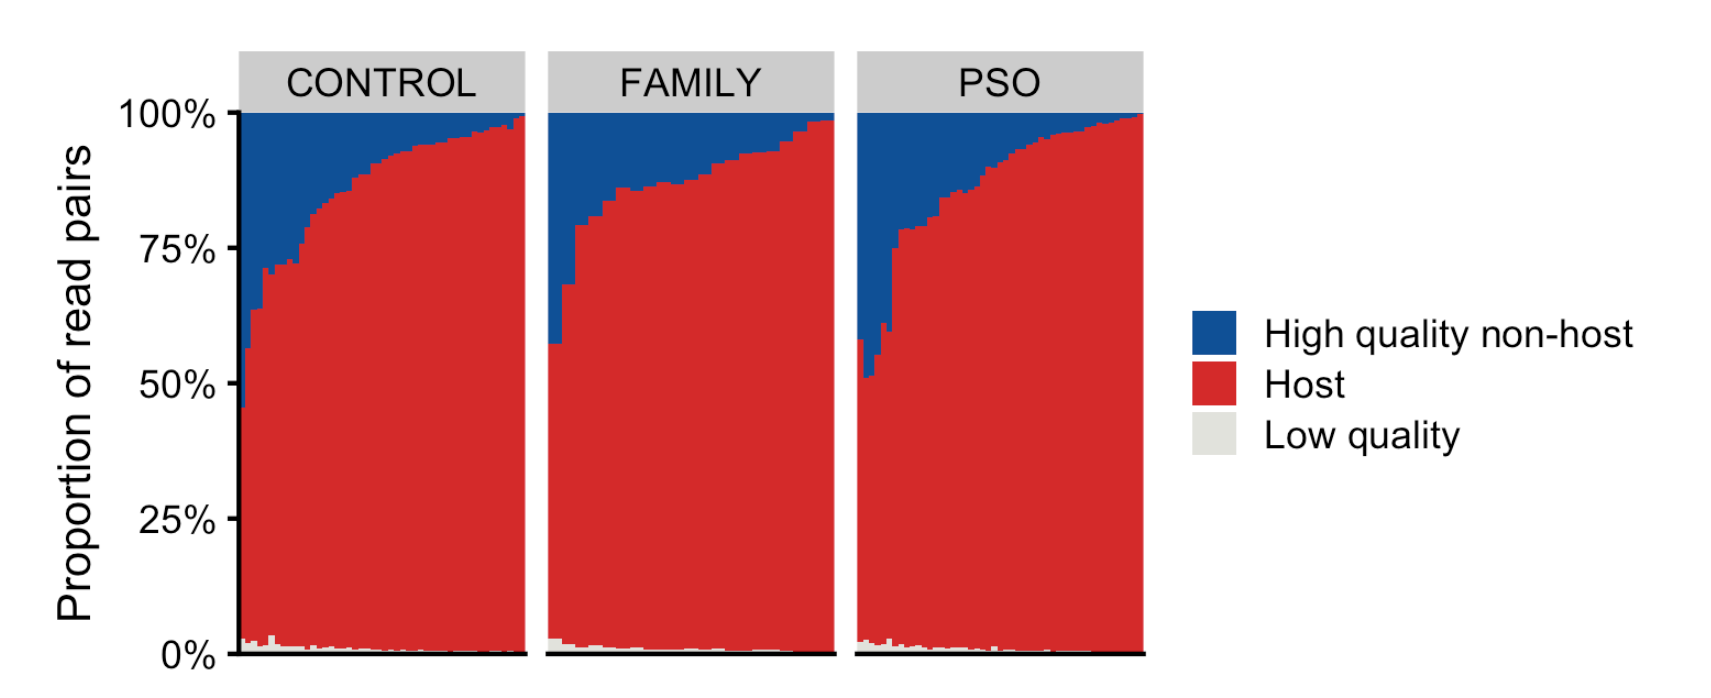


Figure S3: Sample-specific profiling sensitivity of relative species abundance. Bars indicate the relative species abundance where there is 95% chance of detecting a given species based on the number of reads mapping to the signature genes. Samples are ordered by decreasing sensitivity.


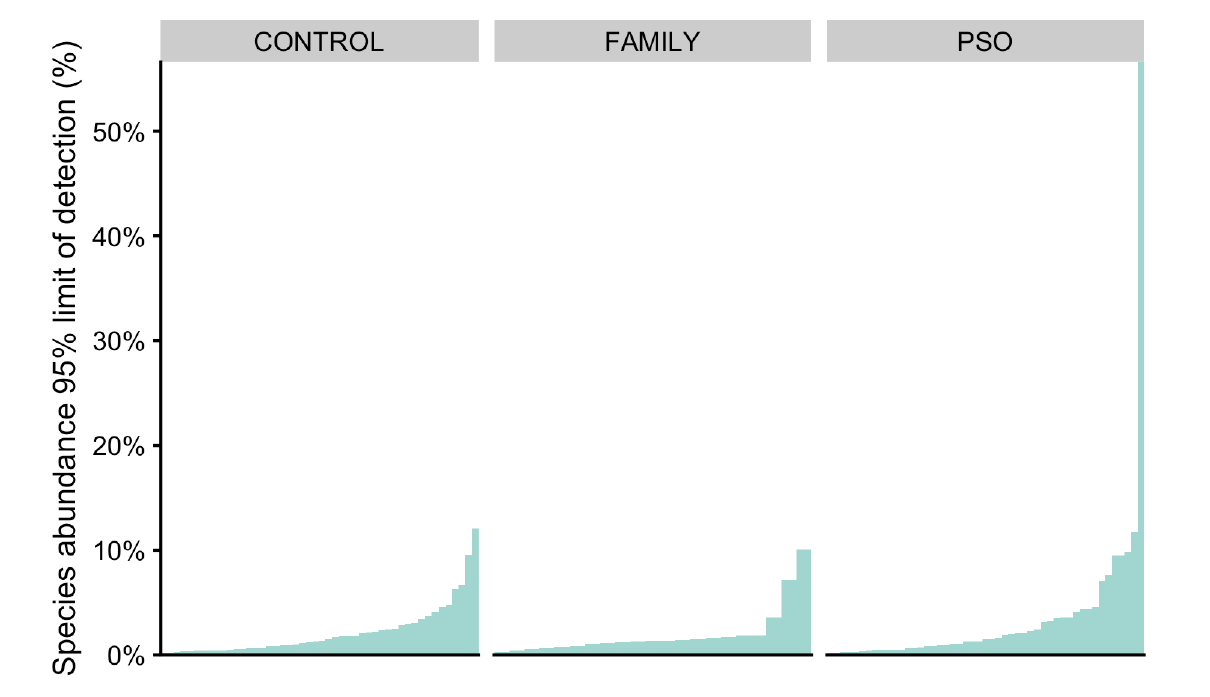


Figure S4: Sample-specific profiling sensitivity of relative species abundance. Bars indicate the relative species abundance where there is 95% chance of detecting a given species based on the number of reads mapping to the signature genes. Samples are ordered by decreasing sensitivity.


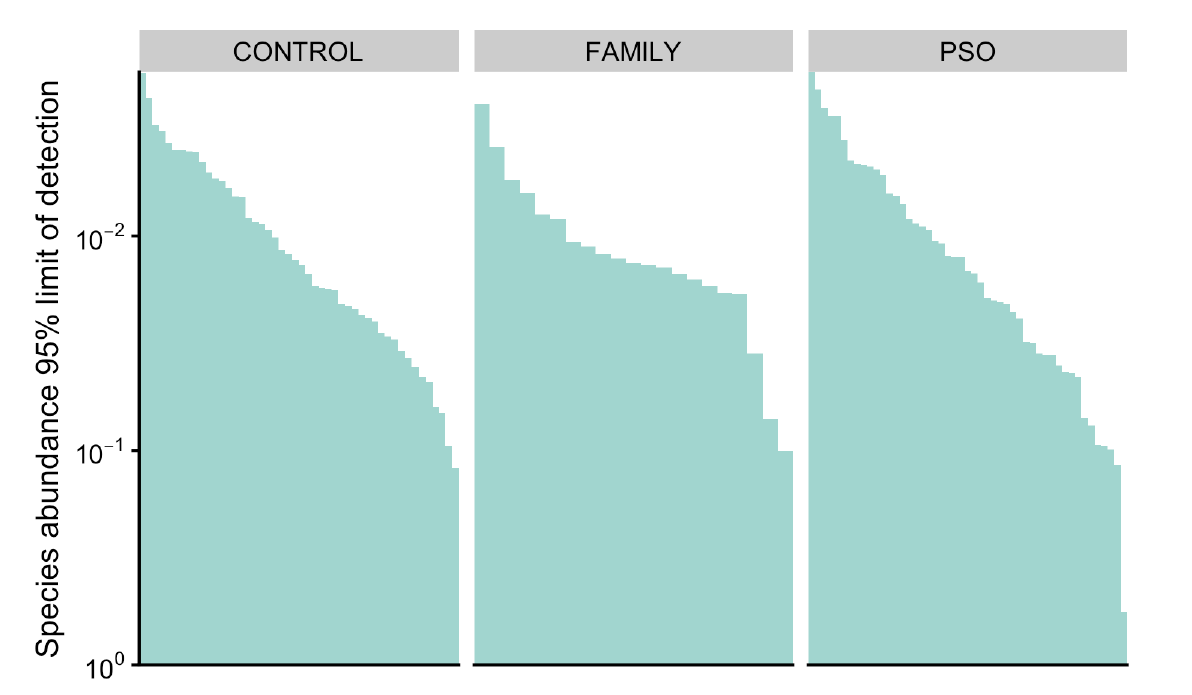


Figure S5: Taxonomic overview at species level per sample. Bar plots display the relative abundance of the ten taxa with highest average abundance across all samples. Light grey (Other) indicates the total relative abundance of species that are not among the ten most abundant taxa. The x-axis is sorted by the most abundant taxa.


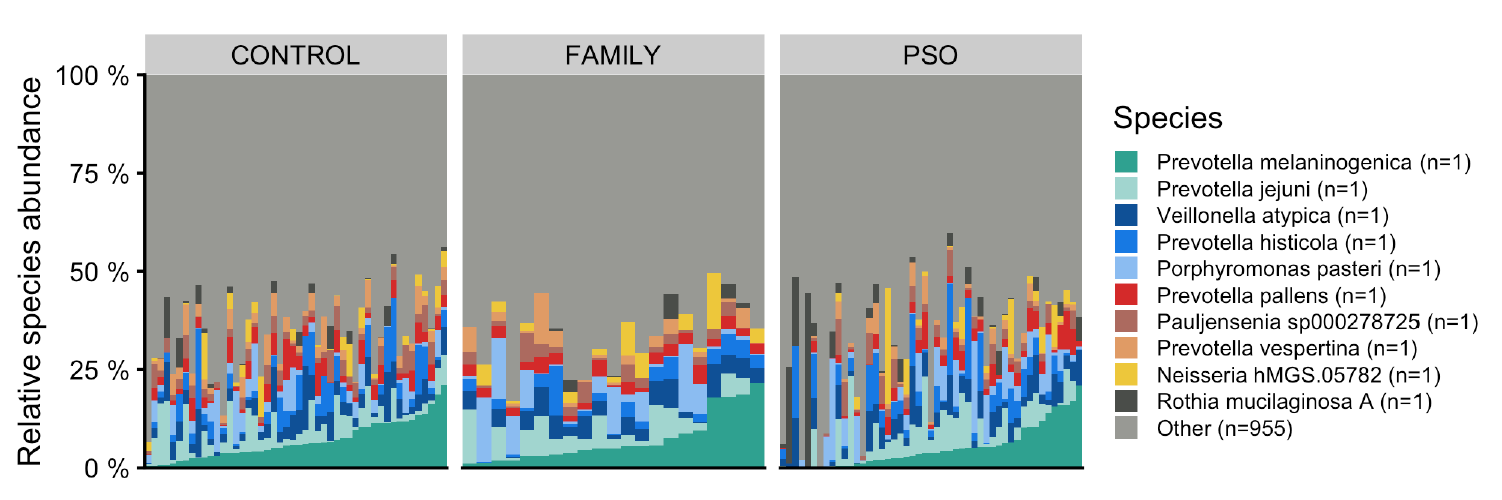


Figure S6: Taxonomic overview at genus level per sample. Bar plots display the relative abundance of the ten taxa with highest average abundance across all samples. Light grey (Other) indicates the total relative abundance of species that are not among the ten most abundant taxa. The x-axis is sorted by the most abundant taxa.


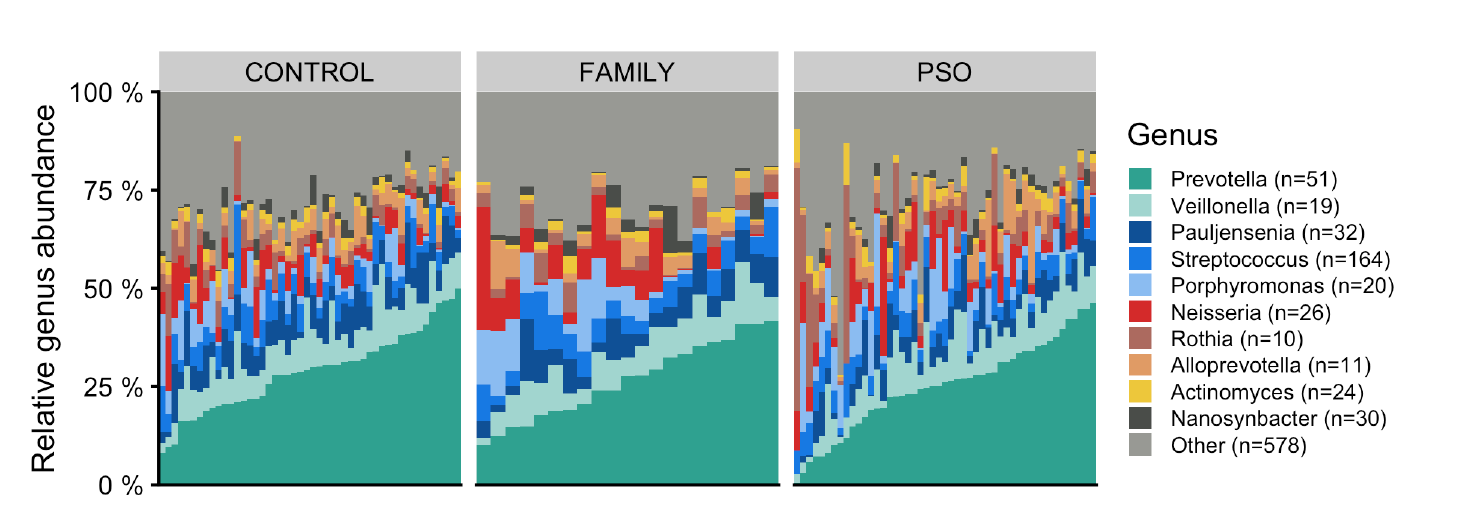


Figure S7: (A) Principal coordinates analysis based on Bray-Curtis dissimilarities among samples, calculated based on the species abundances. Samples are colour coded by group status. The x- and y-axis indicate the microbial variance explained by the first two principal coordinates. (B) Permutational multivariate analysis of variance (PERMANOVA) test of differences in β-diversity without adjustment for diet, smoking and physical activity.


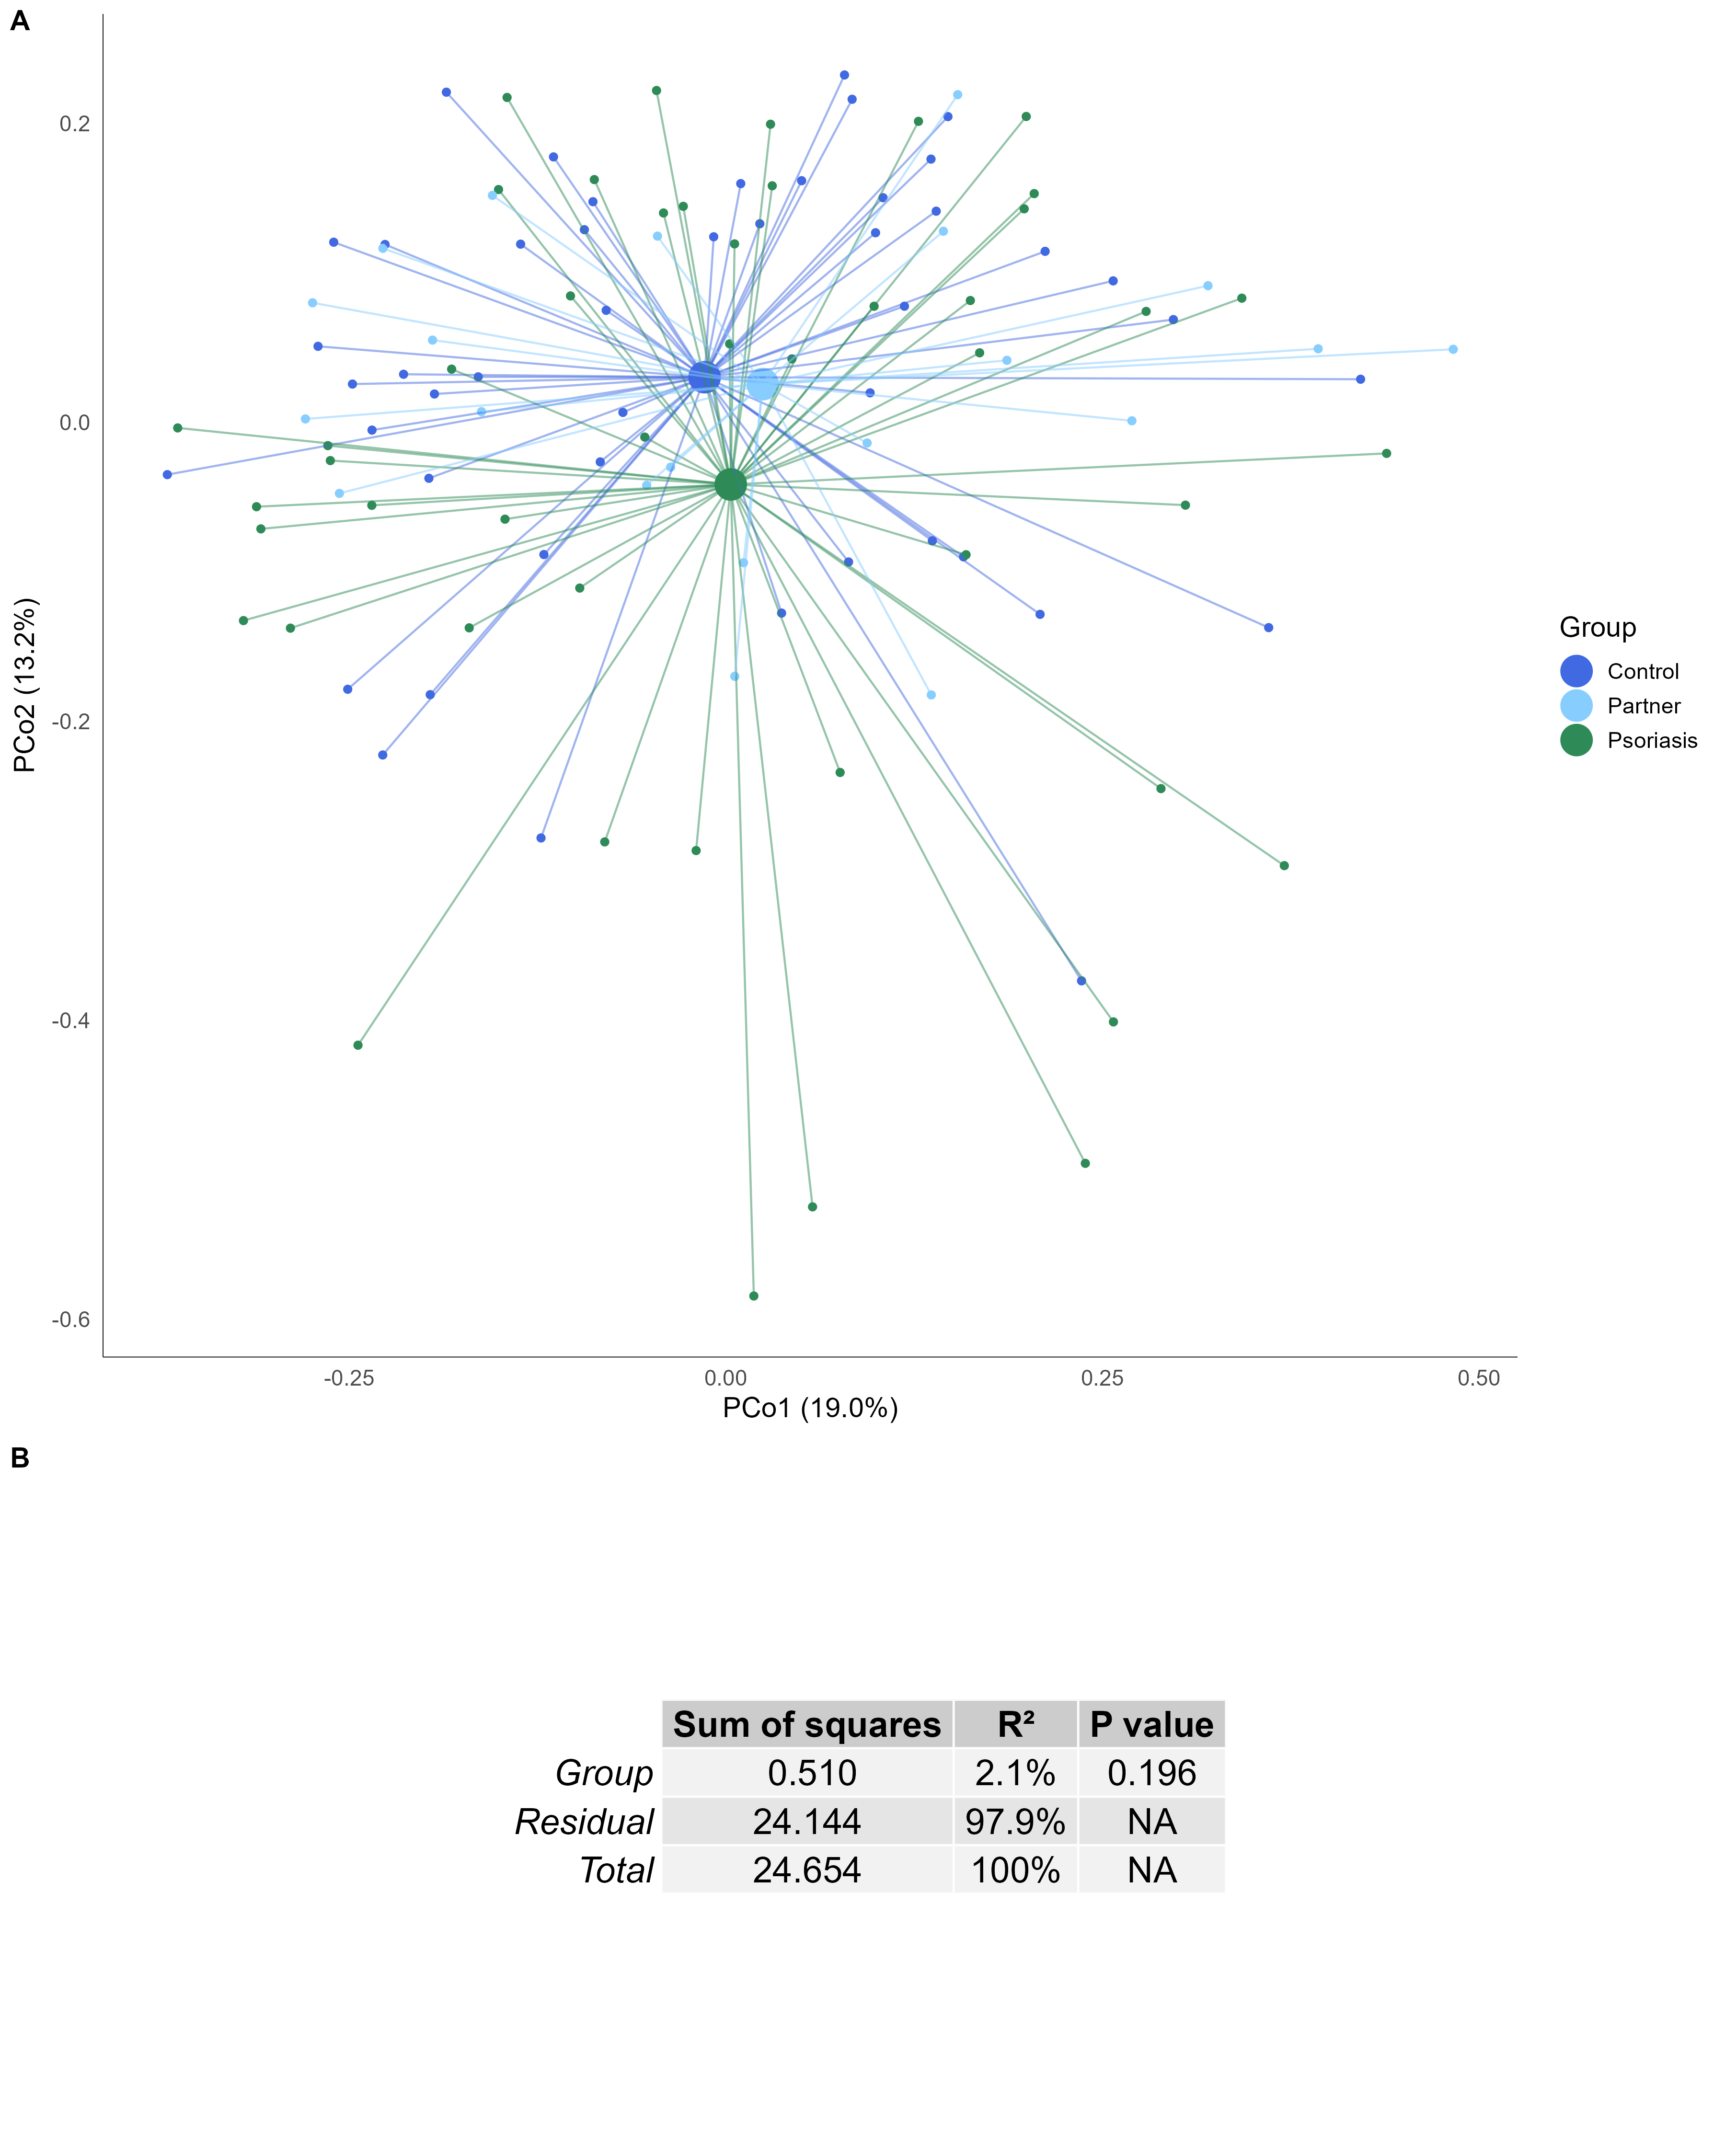


Figure S8: (A) Principal coordinates analysis based on Bray-Curtis dissimilarities among samples, calculated based on the species abundances. Samples are colour coded by smoking status. The x- and y-axis indicate the microbial variance explained by the first two principal coordinates.


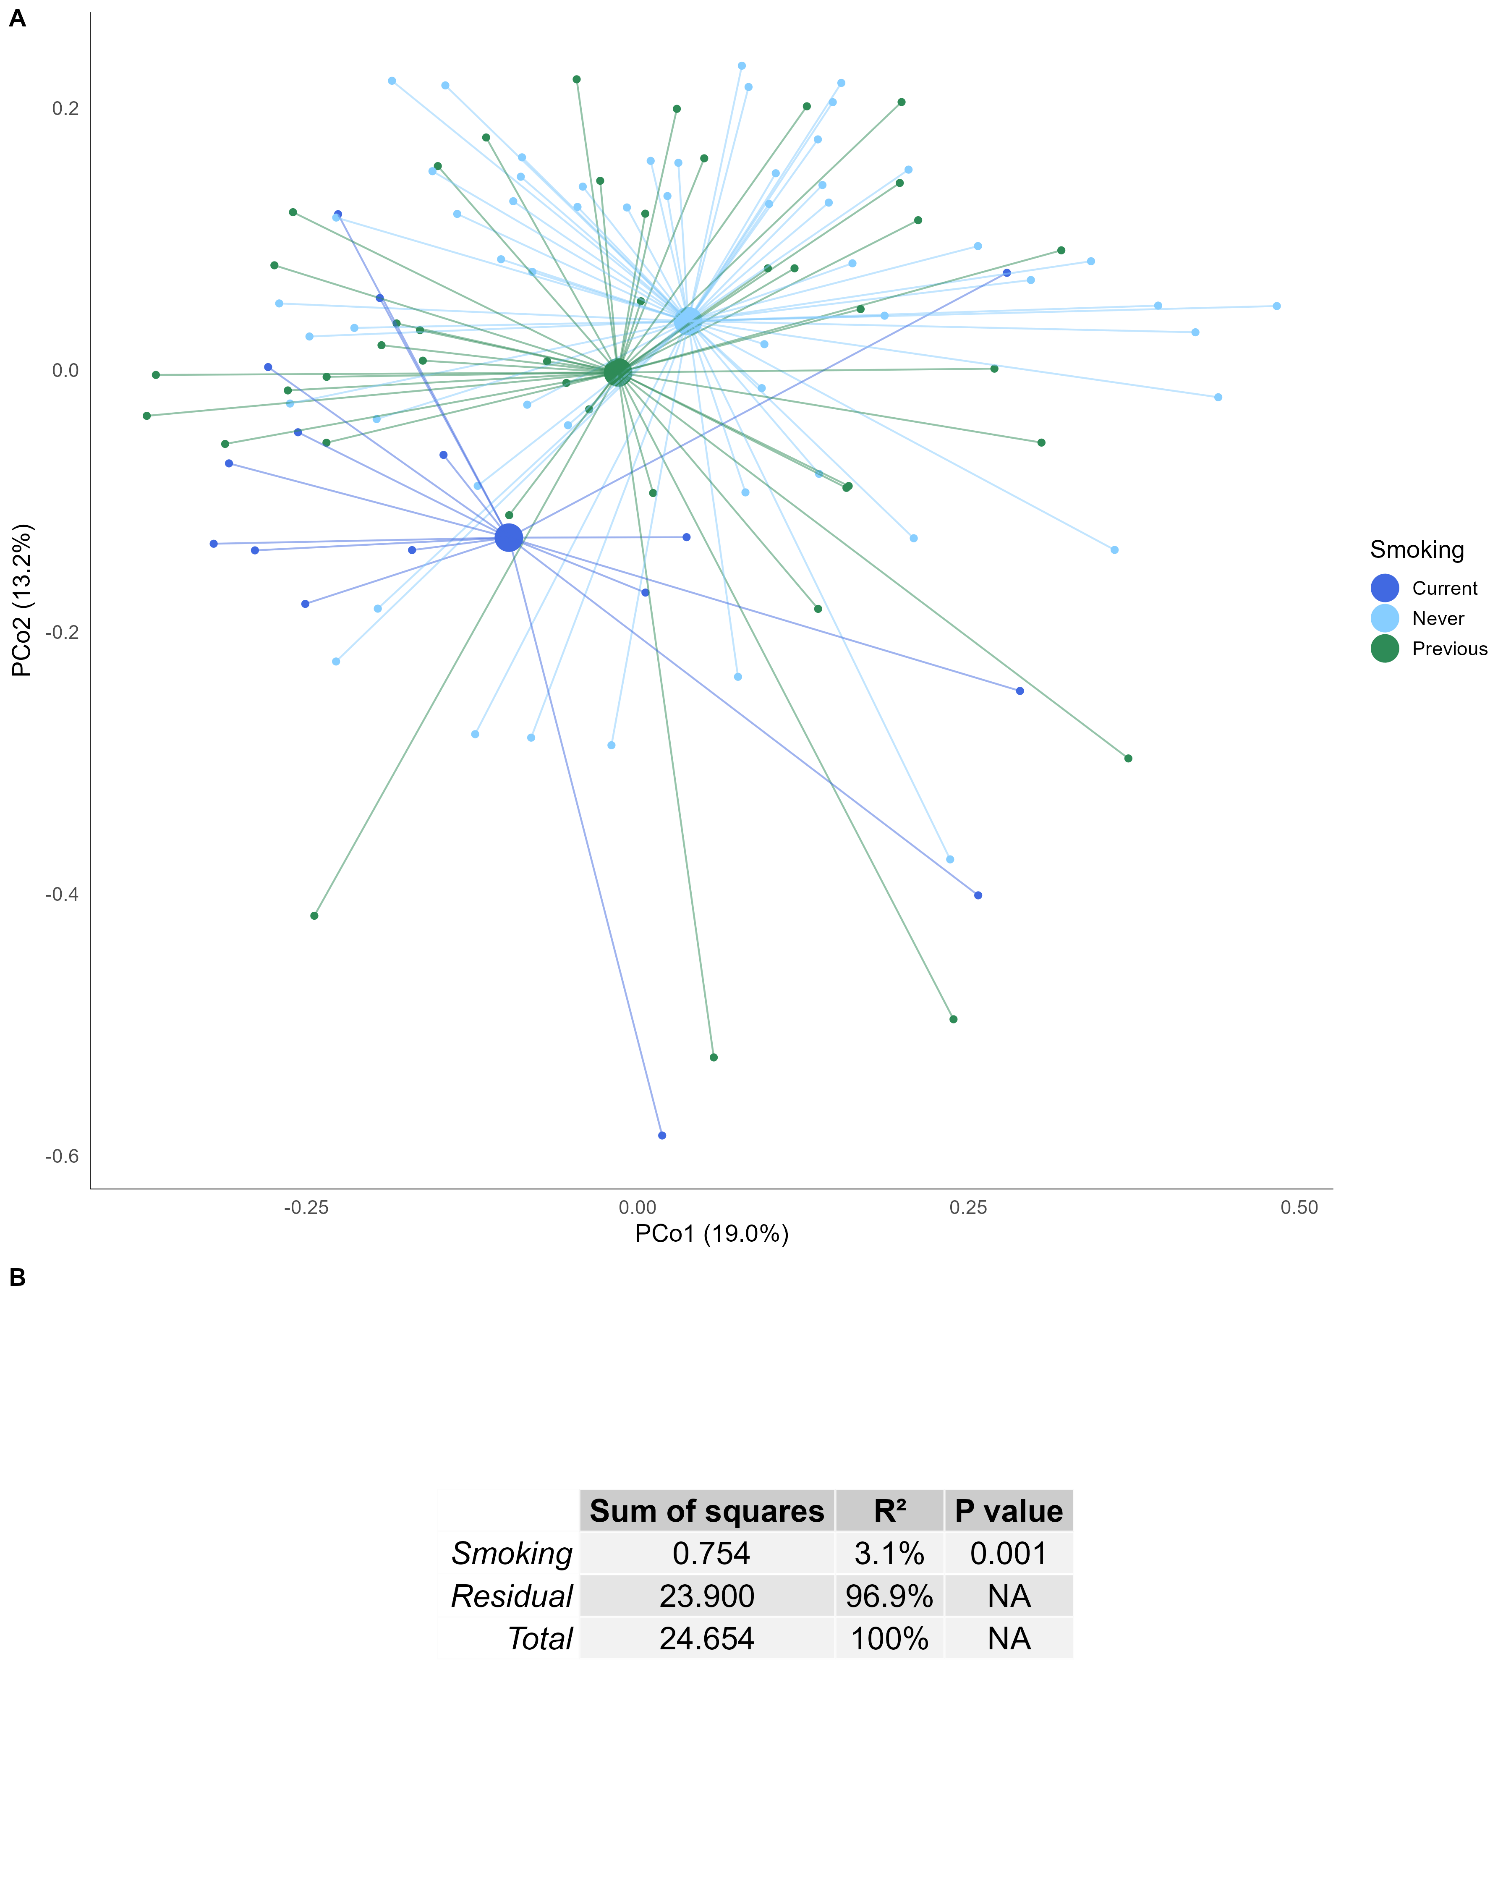


Figure S9: (A) Principal coordinates analysis based on Bray-Curtis dissimilarities among samples, calculated based on the species abundances. Samples are colour coded by diet (DQS). The x- and y-axis indicate the microbial variance explained by the first two principal coordinates

*
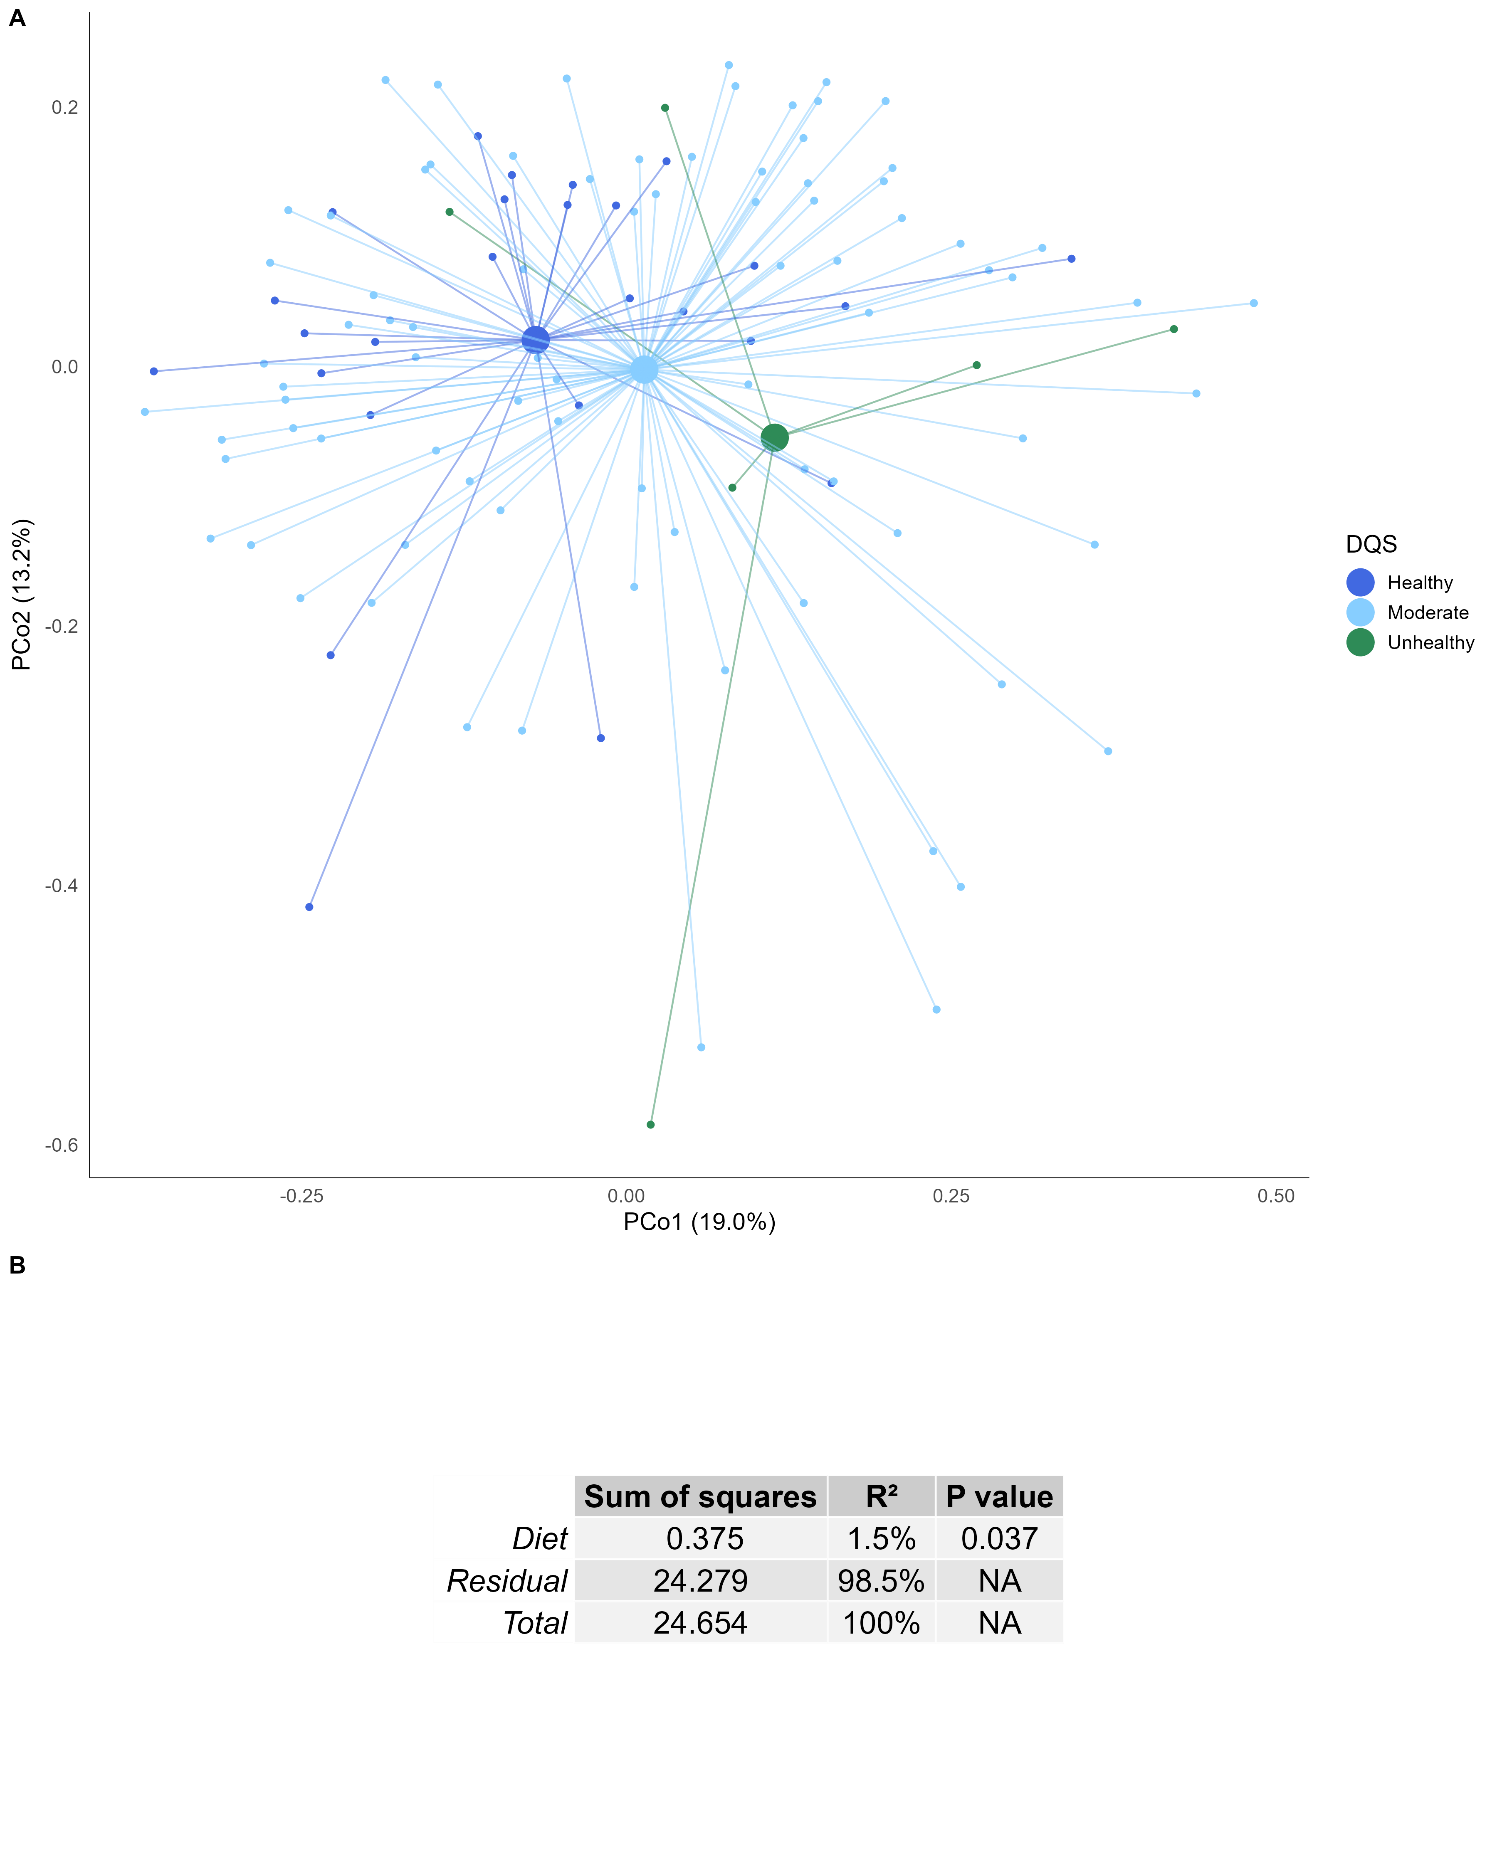
*

**References**

1. Almeida A, Nayfach S, Boland M, *et al.* A unified catalog of 204,938 reference genomes from the human gut microbiome. *Nat Biotechnol* 2021;**39**.

2. Zeng S, Patangia D, Almeida A, *et al.* A compendium of 32,277 metagenome-assembled genomes and over 80 million genes from the early-life human gut microbiome. *Nat Commun* 2022;**13**.

3. Nash AK, Auchtung TA, Wong MC, *et al.* The gut mycobiome of the Human Microbiome Project healthy cohort. *Microbiome* 2017;**5**.

4. Blanco-Míguez A, Beghini F, Cumbo F, *et al.* Extending and improving metagenomic taxonomic profiling with uncharacterized species using MetaPhlAn 4. *Nat Biotechnol* 2023;**41**.

5. Li D, Liu CM, Luo R, Sadakane K, Lam TW. MEGAHIT: An ultra-fast single-node solution for large and complex metagenomics assembly via succinct de Bruijn graph. *Bioinformatics* 2015;**31**.

6. Nurk S, Meleshko D, Korobeynikov A, Pevzner PA. MetaSPAdes: A new versatile metagenomic assembler. *Genome Res* 2017;**27**.

7. Nissen JN, Johansen J, Allesøe RL, *et al.* Improved metagenome binning and assembly using deep variational autoencoders. *Nat Biotechnol* 2021;**39**.

8. Orakov A, Fullam A, Coelho LP, *et al.* GUNC: detection of chimerism and contamination in prokaryotic genomes. *Genome Biol* 2021;**22**.

9. Chaumeil PA, Mussig AJ, Hugenholtz P, Parks DH. GTDB-Tk v2: memory friendly classification with the genome taxonomy database. *Bioinformatics* 2022;**38**.

10. Parks DH, Chuvochina M, Rinke C, Mussig AJ, Chaumeil PA, Hugenholtz P. GTDB: An ongoing census of bacterial and archaeal diversity through a phylogenetically consistent, rank normalized and complete genome-based taxonomy. *Nucleic Acids Res* 2022;**50**.

11. Olm MR, Brown CT, Brooks B, Banfield JF. DRep: A tool for fast and accurate genomic comparisons that enables improved genome recovery from metagenomes through de-replication. *ISME Journal* 2017;**11**.

12. Jain C, Rodriguez-R LM, Phillippy AM, Konstantinidis KT, Aluru S. High throughput ANI analysis of 90K prokaryotic genomes reveals clear species boundaries. *Nat Commun* 2018;**9**.

13. Steinegger M, Söding J. Clustering huge protein sequence sets in linear time. *Nat Commun* 2018;**9**.

14. Fu L, Niu B, Zhu Z, Wu S, Li W. CD-HIT: Accelerated for clustering the next-generation sequencing data. *Bioinformatics* 2012;**28**.

15. Langmead B, Salzberg SL. Fast gapped-read alignment with Bowtie 2. *Nat Methods* 2012;**9**.

16. Schubert M, Lindgreen S, Orlando L. AdapterRemoval v2: Rapid adapter trimming, identification, and read merging. *BMC Res Notes* 2016;**9**.

17. Li H, Durbin R. Fast and accurate short read alignment with Burrows-Wheeler transform. *Bioinformatics* 2009;**25**.

18. de Goffau MC, Lager S, Salter SJ, *et al.* Recognizing the reagent microbiome. Nature Microbiology 2018;**3**.

19. Cantalapiedra CP, Hern̗andez-Plaza A, Letunic I, Bork P, Huerta-Cepas J. eggNOG-mapper v2: Functional Annotation, Orthology Assignments, and Domain Prediction at the Metagenomic Scale. *Mol Biol Evol* 2021;**38**.

20. Huerta-Cepas J, Szklarczyk D, Heller D, *et al.* EggNOG 5.0: A hierarchical, functionally and phylogenetically annotated orthology resource based on 5090 organisms and 2502 viruses. *Nucleic Acids Res* 2019;**47**.

21. Aramaki T, Blanc-Mathieu R, Endo H, *et al.* KofamKOALA: KEGG Ortholog assignment based on profile HMM and adaptive score threshold. *Bioinformatics* 2020;**36**.

22. Zhang H, Yohe T, Huang L, *et al.* DbCAN2: A meta server for automated carbohydrate-active enzyme annotation. *Nucleic Acids Res* 2018;**46**.

23. Kanehisa M, Goto S. KEGG: Kyoto Encyclopedia of Genes and Genomes. Nucleic Acids Research 2000;**28**.

24. Zhou H, He K, Chen J, Zhang X. LinDA: linear models for differential abundance analysis of microbiome compositional data. *Genome Biol* 2022;**23**.

25. Aitchison J. The Statistical Analysis of Compositional Data. *J R Stat Soc Series B Stat Methodol* 1982;**44**.

26. Searle SR, Speed FM, Milliken GA. Population marginal means in the linear model: An alternative to least squares means. *American Statistician* 1980;**34**.

27. White H. A Heteroskedasticity-Consistent Covariance Matrix Estimator and a Direct Test for Heteroskedasticity. *Econometrica* 1980;**48**.

28. Benjamini Y, Hochberg Y. Controlling the False Discovery Rate: A Practical and Powerful Approach to Multiple Testing. *J R Stat Soc Series B Stat Methodol* 1995;**57**.

29. Nielsen HB, Almeida M, Juncker AS, *et al.* Identification and assembly of genomes and genetic elements in complex metagenomic samples without using reference genomes. *Nat Biotechnol* 2014;**32**.

# Figure S10 - Diet Quality Score – Questionnaire

How often do you eat bread with the following types of fat?

|  | More than twice a day | 1–2 times a day | 4–6 times a week | 1–3 times a week | Seldom/never |
| --- | --- | --- | --- | --- | --- |
| Butter, or similar | ☐ | ☐ | ☐ | ☐ | ☐ |
| Margarine or plant-based margarine | ☐ | ☐ | ☐ | ☐ | ☐ |
| Animal fat | ☐ | ☐ | ☐ | ☐ | ☐ |
| Eat bread without any spread | ☐ | ☐ | ☐ | ☐ | ☐ |

How often do you eat the following types of cold cuts or toppings?

|  | More than twice a day | 1–2 times a day | 4–6 times a week | 1–3 times a week | Seldom/never |
| --- | --- | --- | --- | --- | --- |
| Cold cuts, meat | ☐ | ☐ | ☐ | ☐ | ☐ |
| Fish toppings | ☐ | ☐ | ☐ | ☐ | ☐ |
| Eggs | ☐ | ☐ | ☐ | ☐ | ☐ |
| Salad spreads or mayonnaise-based salads | ☐ | ☐ | ☐ | ☐ | ☐ |

How often do you eat the following types of hot meals?

|  | More than once a day | 5–7 times a week | 3–4 times a week | 1–2 times a week | Seldom/never |
| --- | --- | --- | --- | --- | --- |
| Meat (beef, veal, pork, lamb) | ☐ | ☐ | ☐ | ☐ | ☐ |
| Poultry (chicken, turkey, duck) | ☐ | ☐ | ☐ | ☐ | ☐ |
| Fish | ☐ | ☐ | ☐ | ☐ | ☐ |
| Vegetable or vegetarian dishes | ☐ | ☐ | ☐ | ☐ | ☐ |

How often do you eat the following types of vegetables?

|  | More than once a day | 5–7 times a week | 3–4 times a week | 1–2 times a week | Seldom/never |
| --- | --- | --- | --- | --- | --- |
| Mixed salad, raw vegetable mixes | ☐ | ☐ | ☐ | ☐ | ☐ |
| Other raw vegetables | ☐ | ☐ | ☐ | ☐ | ☐ |
| Cooked vegetables (boiled, baked, fried, stewed, or stir-fried dishes) | ☐ | ☐ | ☐ | ☐ | ☐ |

How often do you or others in your household use the following types of fat in cooking?

|  | More than once a day | 5–7 times a week | 3–4 times a week | 1–2 times a week | Seldom/never |
| --- | --- | --- | --- | --- | --- |
| Cooking margarine | ☐ | ☐ | ☐ | ☐ | ☐ |
| Plant margarine | ☐ | ☐ | ☐ | ☐ | ☐ |
| Butter or similar | ☐ | ☐ | ☐ | ☐ | ☐ |
| Animal fat/lard (e.g., Palmin) | ☐ | ☐ | ☐ | ☐ | ☐ |
| Olive oil | ☐ | ☐ | ☐ | ☐ | ☐ |
| Corn, sunflower, or grape seed oil | ☐ | ☐ | ☐ | ☐ | ☐ |
| Rapeseed, canola, or salad oil | ☐ | ☐ | ☐ | ☐ | ☐ |
| Cook without using fat | ☐ | ☐ | ☐ | ☐ | ☐ |

How often do you eat or drink the following?

|  | More than once a day | 5–7 times a week | 3–4 times a week | 1–2 times a week | Seldom/never |
| --- | --- | --- | --- | --- | --- |
| Food from pizzerias, burger bars, shawarma bars, etc. | ☐ | ☐ | ☐ | ☐ | ☐ |
| Cakes, chocolate, ice cream, and candy | ☐ | ☐ | ☐ | ☐ | ☐ |
| Soft drinks, cola, juice, and similar with sugar | ☐ | ☐ | ☐ | ☐ | ☐ |
| Soft drinks, cola, juice, and similar without sugar | ☐ | ☐ | ☐ | ☐ | ☐ |
| Energy drinks (e.g., Red Bull, Cult, etc.) | ☐ | ☐ | ☐ | ☐ | ☐ |

How many portions of fruit do you usually eat? (1 portion = 1 piece or 1 dl – include fruit compote or fruit purée)

>6 times/day ☐

5–6/day ☐

3–4/day ☐

1–2/day ☐

5–6/week ☐

None ☐

Would you like to eat more healthily?

☐ Yes ☐ No

If you want to eat more healthily, would you like support or help to achieve this?

☐ Yes ☐ No

Do you have support for eating more healthily from your social circle (e.g., family, friends, colleagues, acquaintances)?

☐ Yes ☐ No

How would you rate your overall dietary habits?

☐ Very healthy ☐ Healthy ☐ Fairly healthy ☐ Unhealthy ☐ Very unhealthy

Construction of the DQS

| Food | Frequency | Score |
| --- | --- | --- |
| Vegetables (cooked or raw) and/or vegetarian dishes | ≥ 5-7 servings/week | 3 points |
|  | The answers in between | 2 points |
|  | ≤ 2 servings/week | 1 point |
| Fruit | ≥ 3 pieces/day | 3 points |
|  | ≥ 3 pieces/week and ≤ pieces/day | 2 points |
|  | ≤ 2 pieces/week | 1 point |
| Fish | ≥ 200 g/week | 3 points |
|  | Answers in between | 2 points |
|  | No intake | 1 point |
| Fat |  |  |
| Fat, bread | None | (3 points) |
|  | Minarine, vegetable margarine | (2 points) |
|  | Butter, blended spread, lard | (1 point) |
| Fat, cooking | None/olive oil | (3 points) |
|  | Vegetable margarine, oil | (2 points) |
|  | Margarine, butter, blended spread, lard | (1 point) |
| Fat, summarized | 6 points, summarized | 3 points |
|  | 3-5 points, summarized | 2 point |
|  | 2 points, summarized | 1 point |
